# Supplementary material for: Electrospun TiO2–SiO2 fibres with hierarchical pores from phase separation
Source: Royal Society of Chemistry journal article supplement (doi:10.1039/c7ce00471k), 2017-01-01
Supplement: c7ce00471k1.pdf [file c7ce00471k1.pdf]

**Supplementary information for:**

## Electrospun TiO<sub>2</sub>-SiO<sub>2</sub> fibres with hierarchical pores from phase separation

Yun Wang,<sup>a</sup> Haibo Huang,<sup>a</sup> Guannan Li,<sup>a</sup> Xiaojuan Zhao,<sup>a</sup> Lin Yu,<sup>b</sup> Chen Zou<sup>a</sup> and Yan Xu<sup>\*a</sup>

<sup>a</sup> State Key Lab of Inorganic Synthesis and Preparative Chemistry, Jilin University, Changchun, 130012, China

<sup>b</sup> State Key Laboratory of Supramolecular Structure and Materials, Jilin University, Changchun, 130012, China

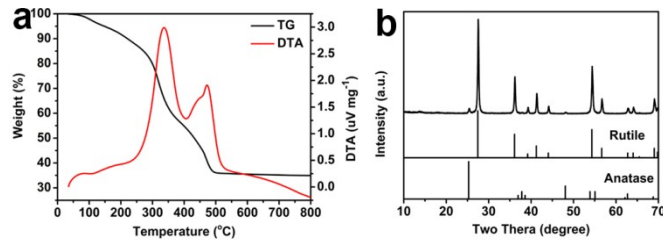

**Fig. S1** (a) TG-DTA curves of the as-electrospun PVP/TiO<sub>2</sub> composite fibres; (b) The XRD pattern of the TiO<sub>2</sub> fibres calcinated at 600 °C for 6 h, indicating mainly rutile phase of the fibres.

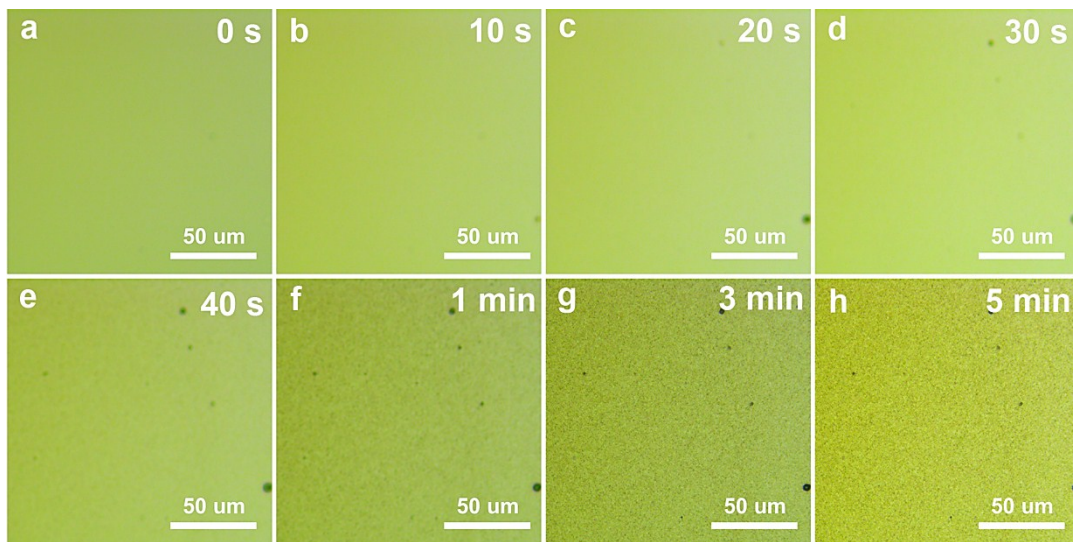

**Fig. S2** Optical microscope images of the droplets made of the electrospun precursor with EtOH as solvent at different evaporating times.

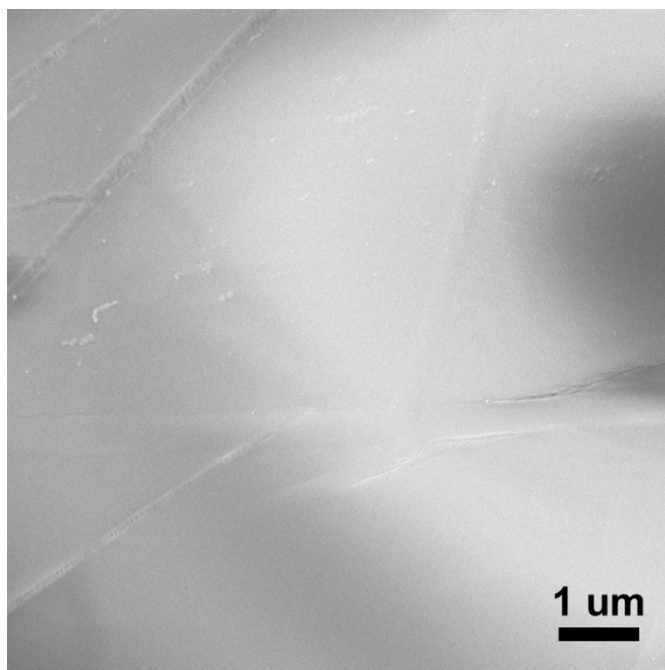

**Fig. S3** SEM image of the electrospun product from precursors without TBT, which is non-filamentous and adhered to the collector.

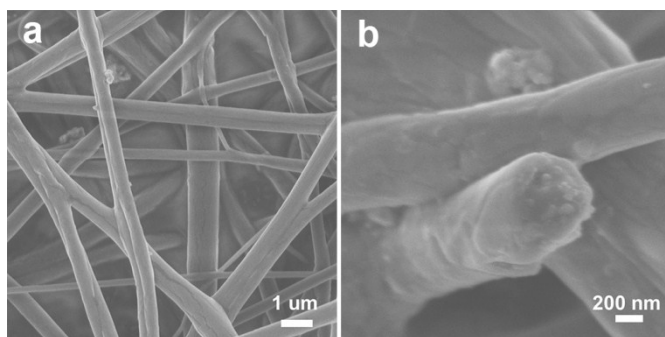

**Fig. S4** (a) SEM image and (b) high magnification SEM image of the electrospun product from precursors without TEOS.
